# Supplementary material
Source: JCI journal article supplement (doi:10.1172/jci138066)

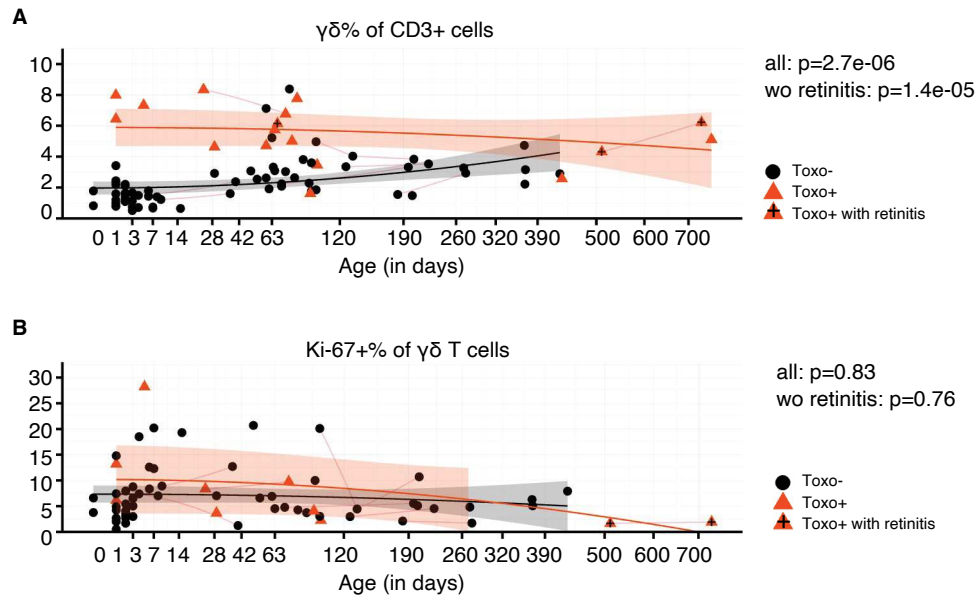

Figure 1

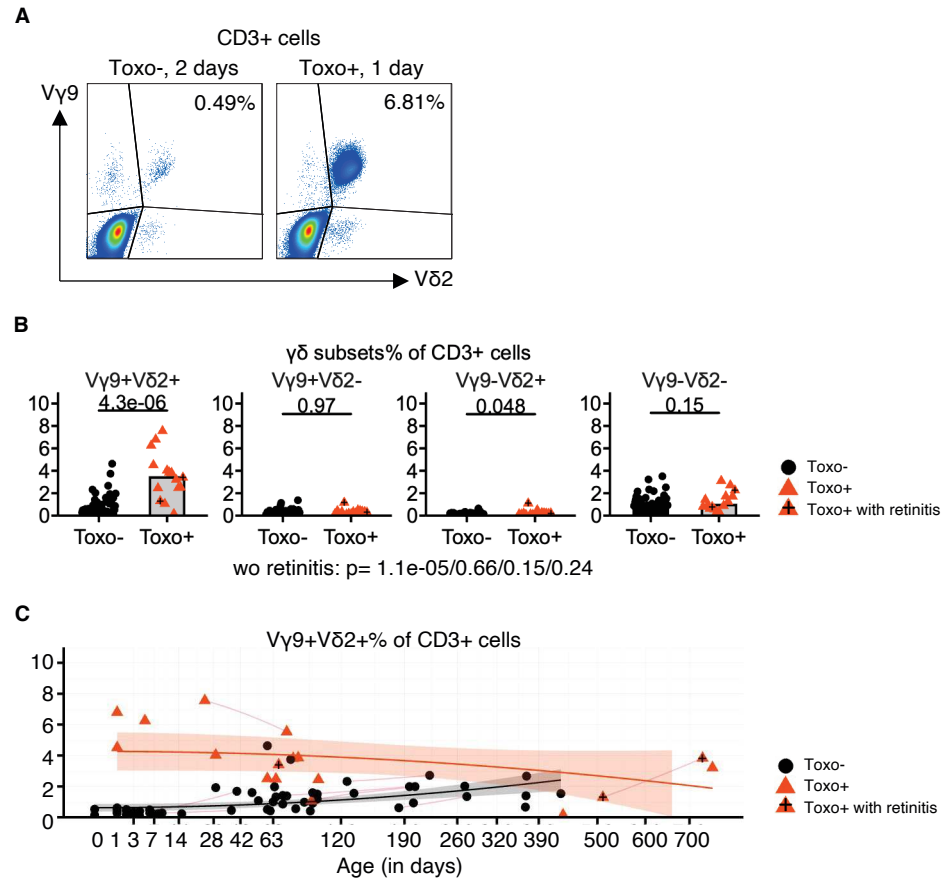

Figure 2

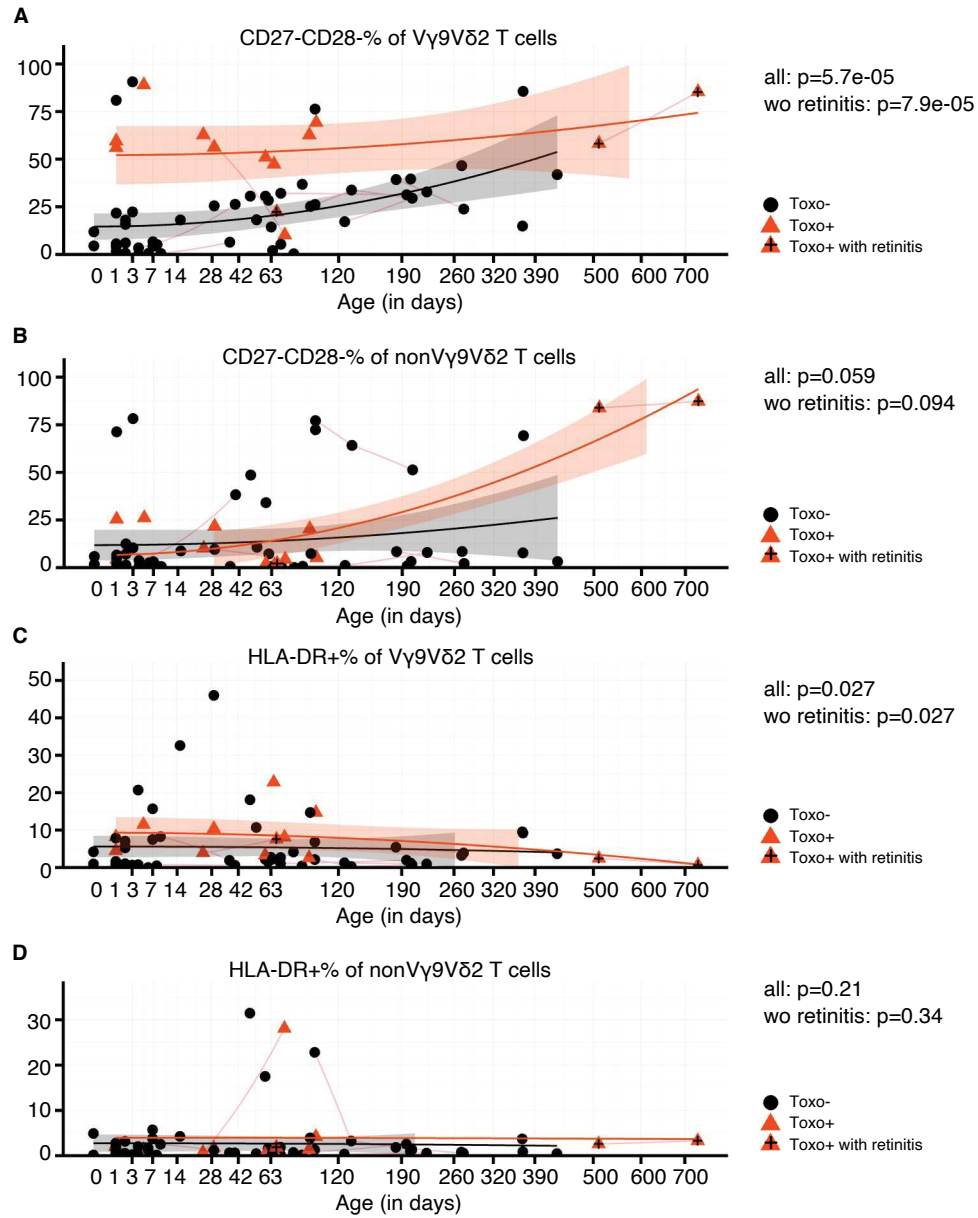

Figure 3

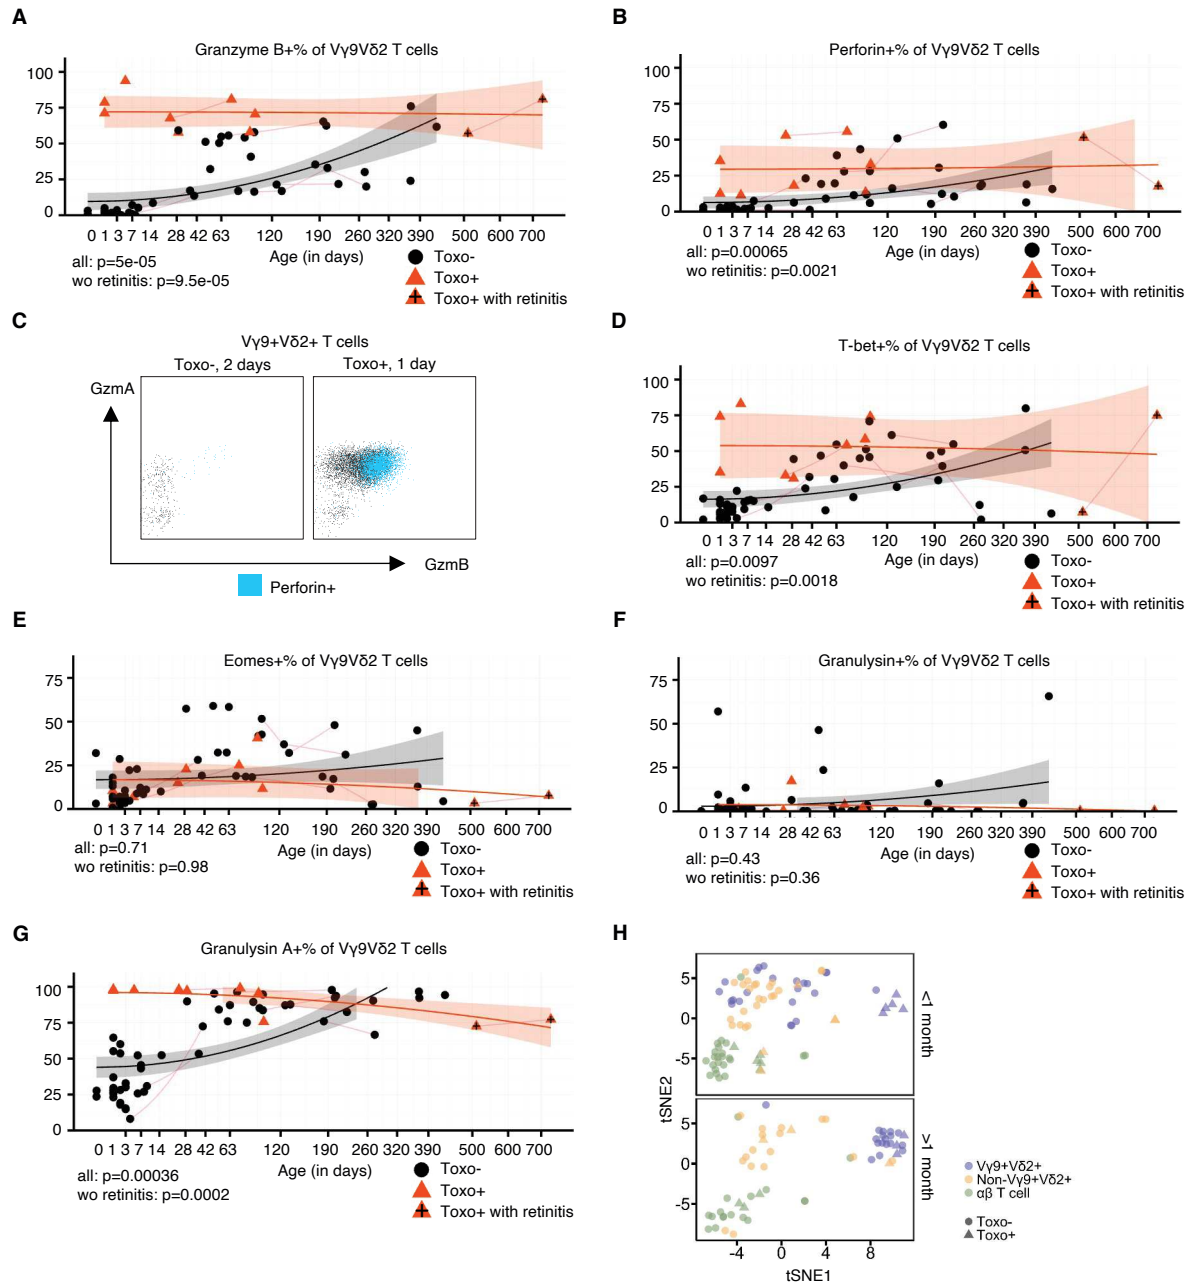

Figure 4

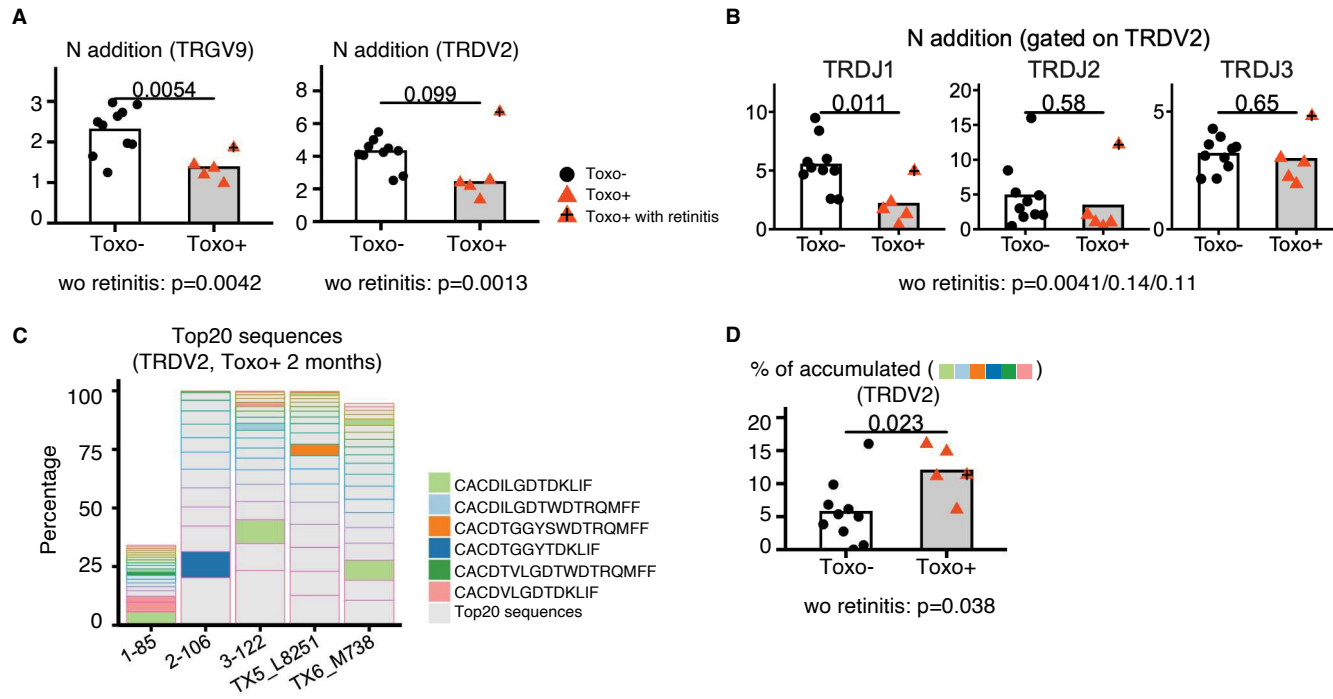

Figure 5

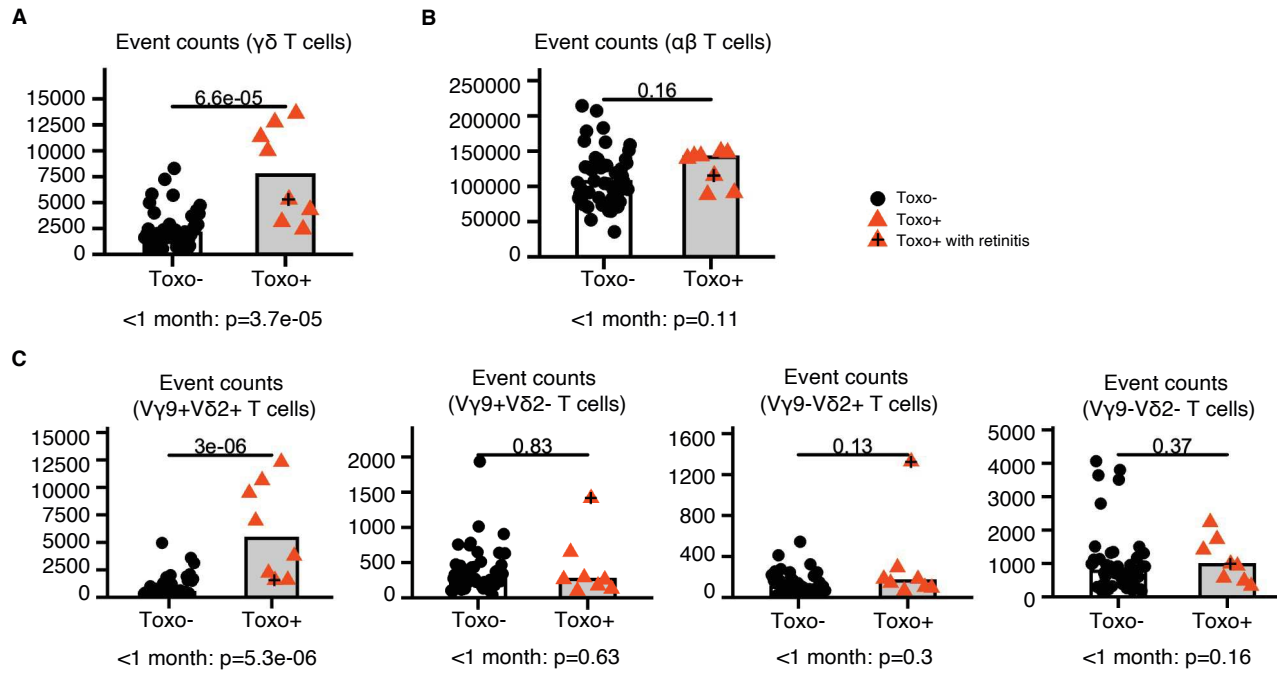

Supplemental figure 1

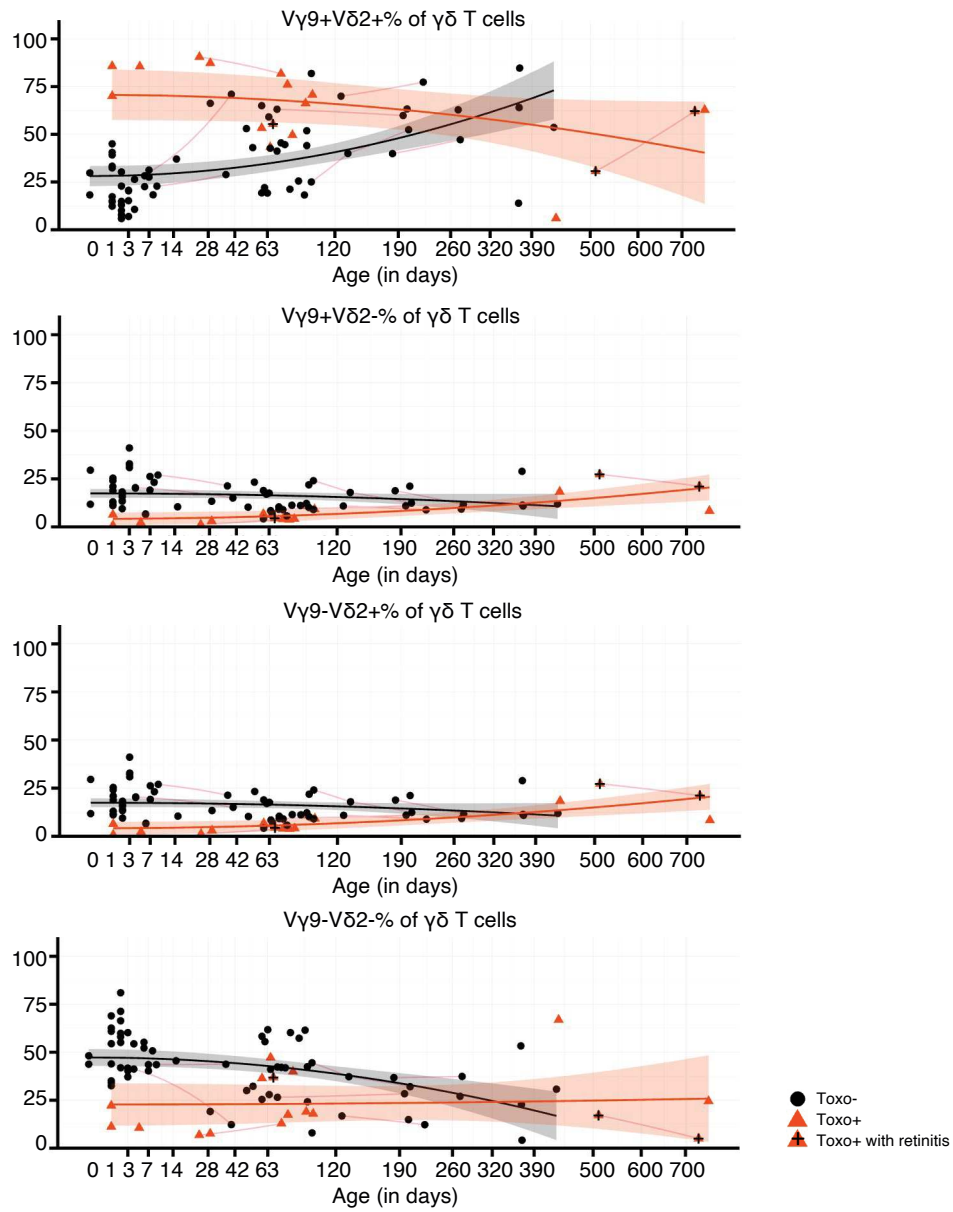

Supplemental figure 2

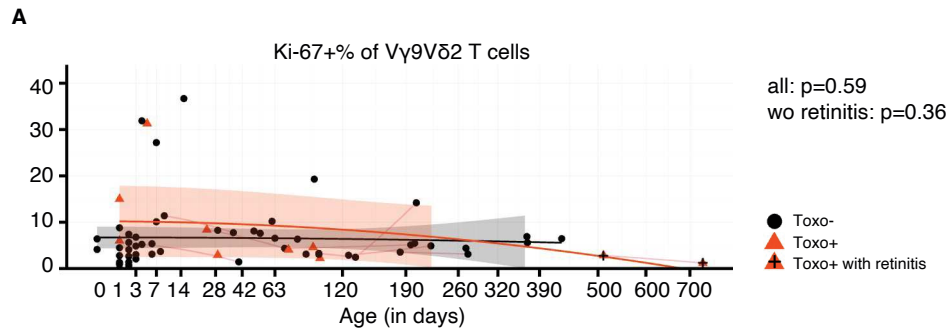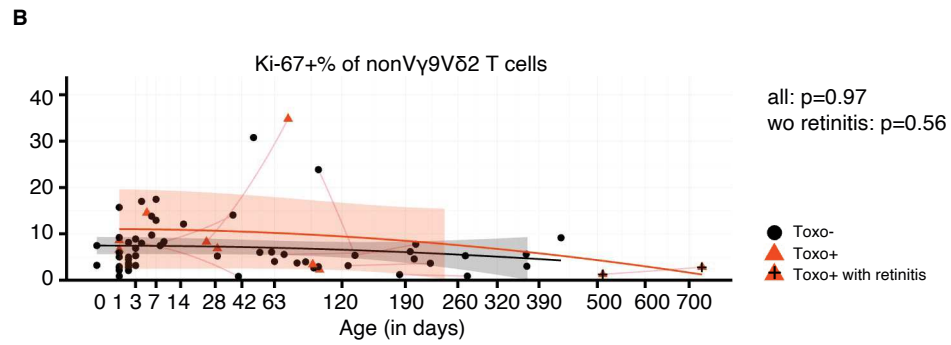

Supplemental figure 3

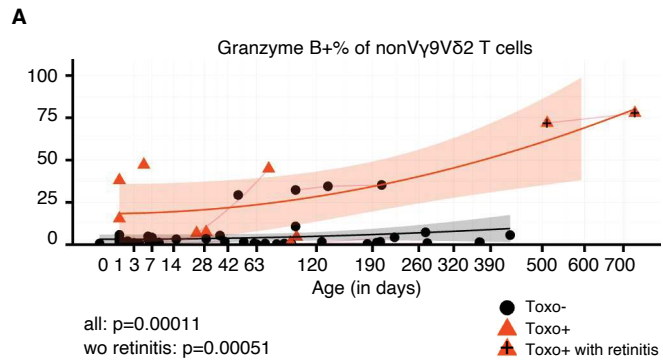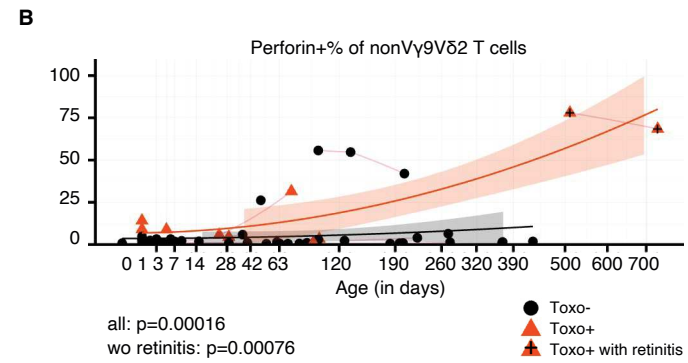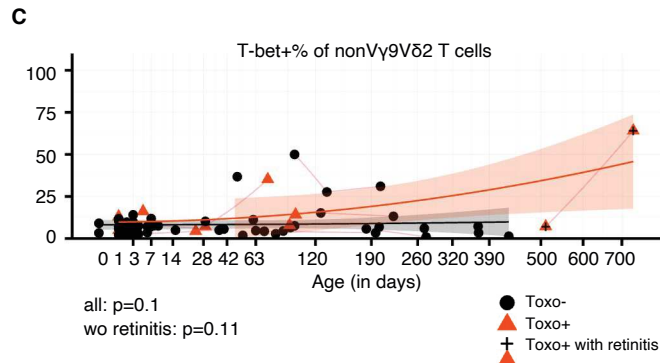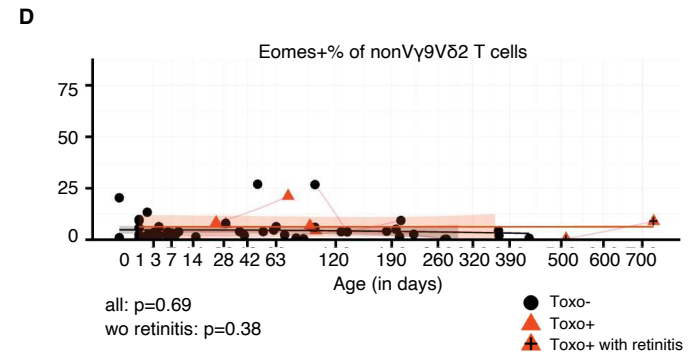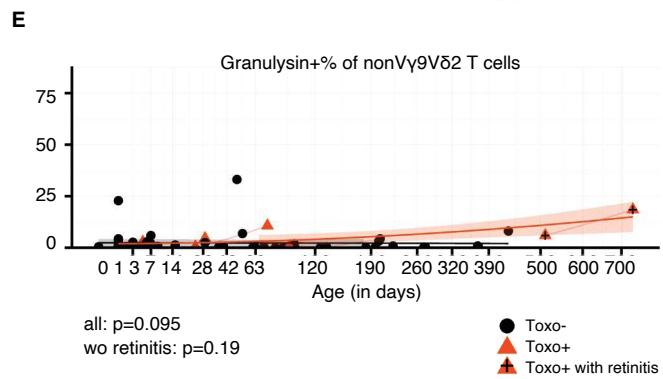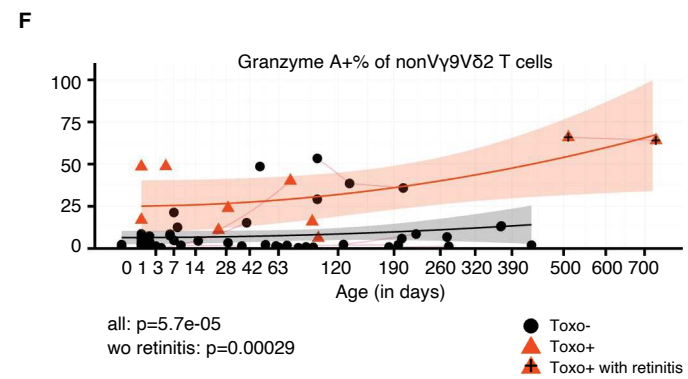

Supplemental figure 4

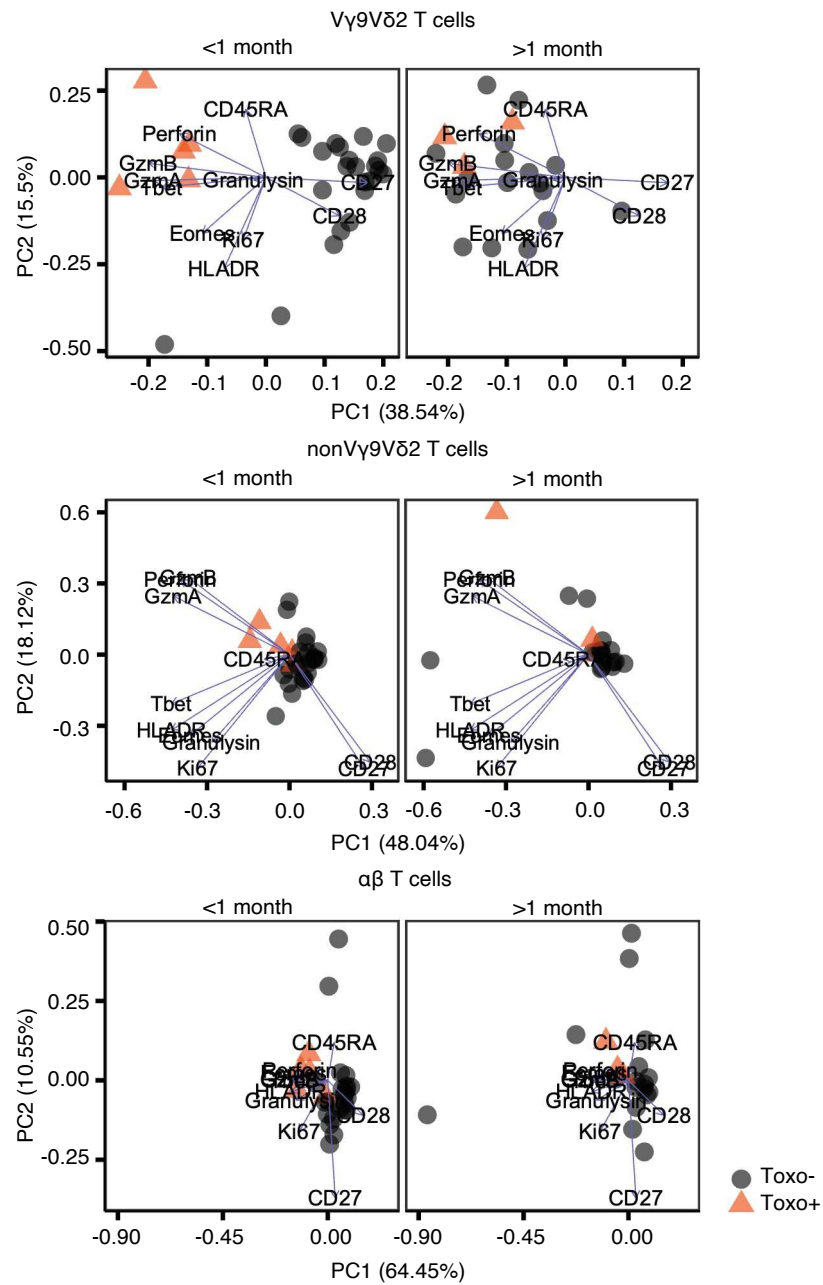

Supplemental figure 5

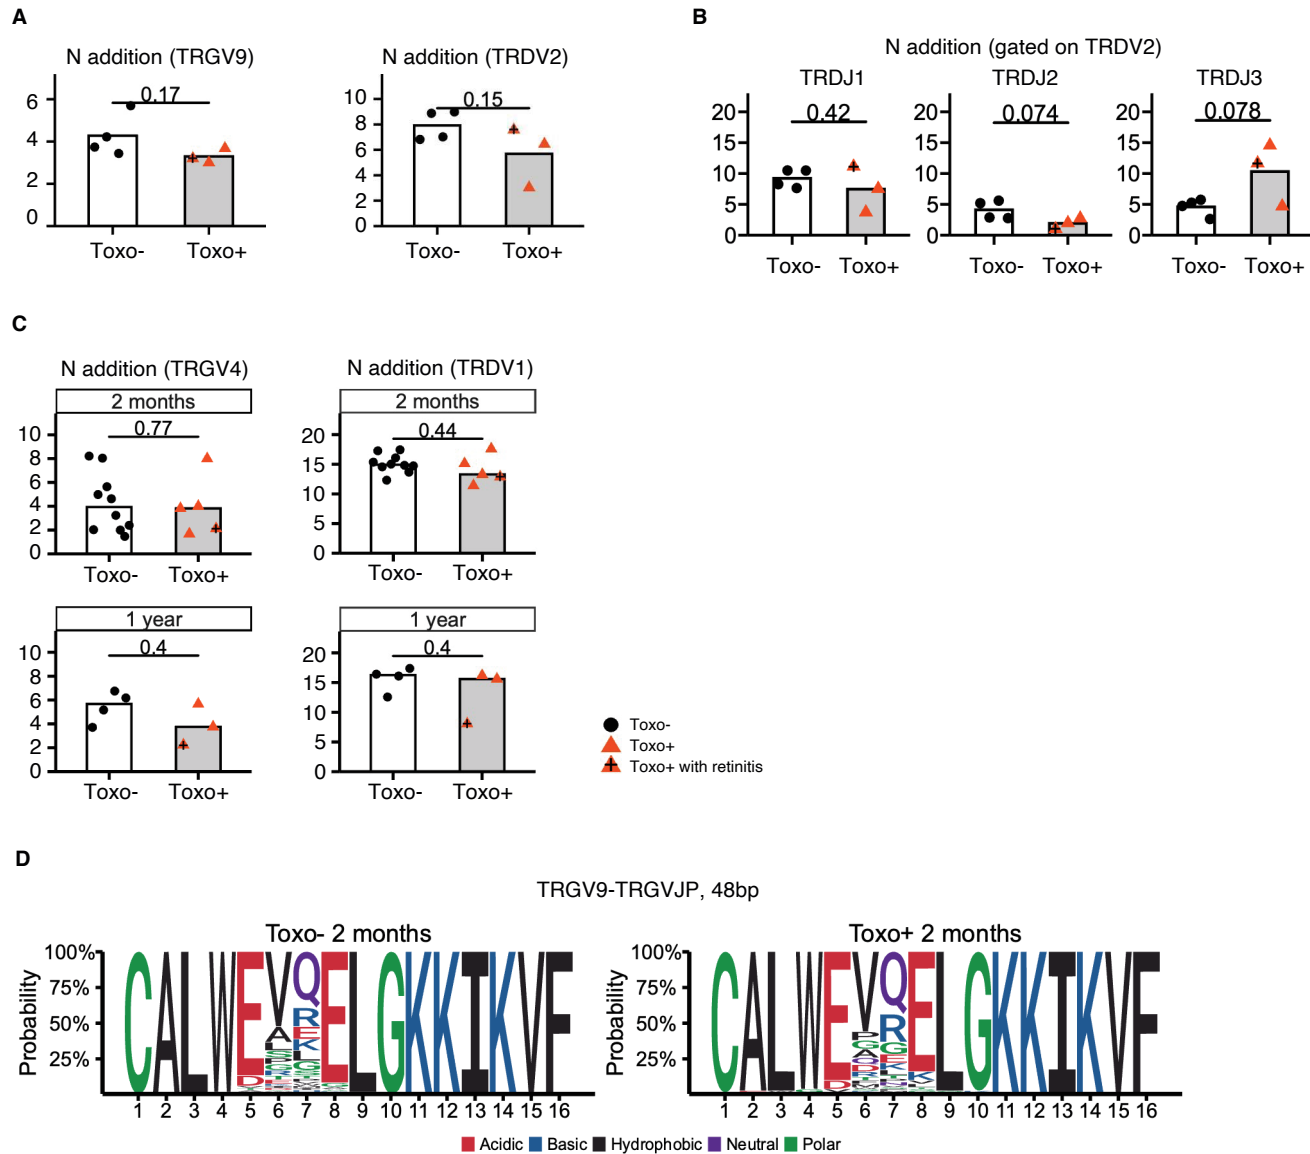

Supplemental figure 6

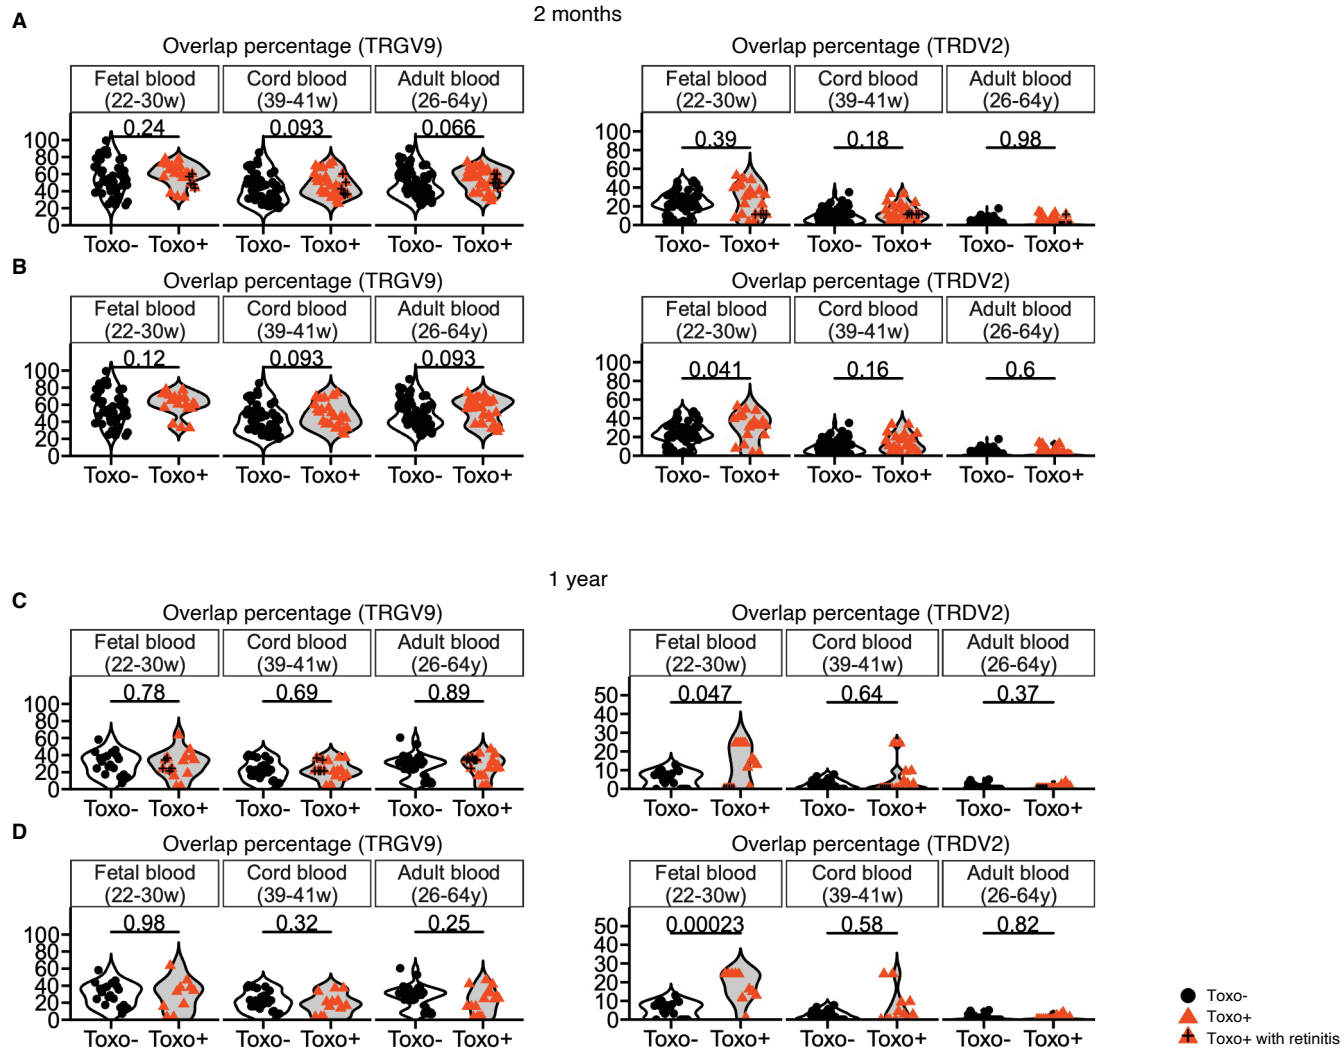

Supplemental figure 7

Germline sequence:

|                     |                   |                                                                      |
|---------------------|-------------------|----------------------------------------------------------------------|
| <b>TRDV2</b>        | <b>TRDD3</b>      | <b>TRDJ1</b>                                                         |
| TGT GCC TGT GAC ACC | ACT GGG GGA TAC G | AC ACC GAT AAA CTC ATC TTT GGA AAA GGA ACC CGT GTG ACT GTG GAA CCA A |
| C A C D T           | T G G Y           | T D K L I F G K G T R V T V E P                                      |

■ CACDVLGDTDKLIF

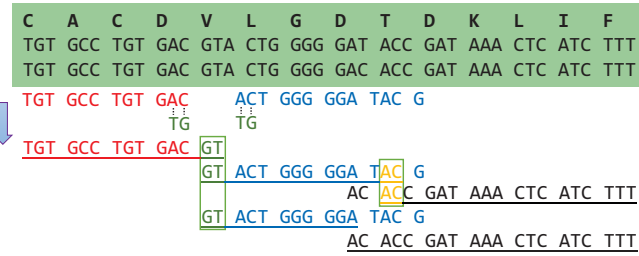

■ CACDILGDTDKLIF

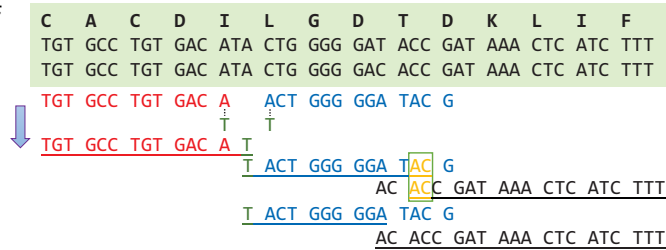

■ CACDTGGYTDKLIF

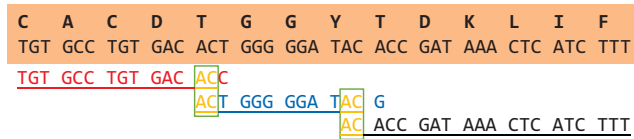

Supplement: sd1 [file 1]
